# Supplementary material for: Social Determinants of Health, the Diagnostic Odyssey, and Genetic Testing for Global Developmental Delay/Intellectual Disability: A Qualitative Study
Source: Research Square preprint supplement (doi:10.21203/rs.3.rs-8378360/v1), 2026-01-28
Supplement: Supplementary file 1 [file 40b7f788adfe623944f8c55f.docx]

**Additional File 3: Codebook**

| **Parent Code** | **Subcodes** | **Brief Definition** |
| --- | --- | --- |
| Diagnostic Odyssey |  | The process of receiving a diagnosis of a neurodevelopmental disorder |
|  | Acknowledgement of developmental delay | Where participants mention noticing or being told about their child’s delays |
|  | Doctors’ appointments/hospital visits | Mentions of doctors’ appointments or hospital visits within the diagnostic timeline |
| Experiences/Expectations |  | Experiences or expectations held by parents/caregivers throughout the diagnostic timeline |
|  | Feelings of being heard/listened to (or not) | The extent to which participants believe doctors, clinicians, and/or providers care about and listen to their experience |
|  | Satisfaction with doctors/hospitals | The extent to which participants are satisfied or unsatisfied with their treatment by doctors/hospitals |
| Facilitators/Barriers |  | Promoters and/or barriers participants experienced while trying to receive a diagnosis for their child |
|  | Appointment scheduling/Accessibility of specialists | The extent to which appointment scheduling and lack thereof has impacted participants’ ability to receive a diagnosis |
|  | Concern for misuse of genetic data | The extent to which worries how their child’s genetic information would be used impacted participants’ willingness to have their child undergo genetic testing |
|  | Equity/Inequity | The extent to which patients receive the same or a lesser level of care across the board due to race/ethnicity or socioeconomic status |
|  | Health literacy/Parental knowledge | The extent to which participants understand and use healthcare information in order to receive a diagnosis |
|  | Insurance coverage/Cost | The extent to which insurance coverage and lack thereof has impacted participants’ ability to receive a diagnosis |
|  | Level of trust in healthcare system/providers | The extent to which participants trust their providers and the healthcare system with their child’s care |
|  | Social support | The extent to which participants feel supported by friends, family, and their community |
|  | Socioeconomic status | The extent to which participants’ education, occupation, and income impact their ability to receive a diagnosis |
| Genetic Testing |  | Testing that children with neurodevelopmental disorders may or may not receive to assist with diagnosis |
|  | Family history | The extent to which genetics have played a role in the patient’s family |
|  | Opinions on genetic testing | The participant’s thoughts and feelings on usefulness and impact of genetic testing |
|  | Receiving genetic testing/Type of testing (known or not known) | The mention of getting genetic testing done at the recommendation of a doctor or by the suggestion of the parent |
| Recommendations for reaching more affected families |  | Participants’ advice/thoughts on how to reach families with children affected by neurodevelopmental disorders who may not be in the medical system. |
