# Supplementary material for: Social Determinants of Health, the Diagnostic Odyssey, and Genetic Testing for Global Developmental Delay/Intellectual Disability: A Qualitative Study
Source: Research Square preprint supplement (doi:10.21203/rs.3.rs-8378360/v1), 2026-01-28
Supplement: Supplementary file 2 [file 9a803e55df149a61a6f4ee5f.docx]

**Additional File 1: Consolidated criteria for Reporting Qualitative studies (CoReQ) 32-item checklist1**

| Item | Description |
| --- | --- |
| **Domain 1: Research Team and Reflexivity** | |
| Personal Characteristics |  |
| 1. Interviewer/facilitator | Authors JJC and EAK conducted the interviews. |
| 1. Credentials | JJC: MD. EAK: MPH. AS: MS. JBB: PhD, MPE. CAG: MD, PhD. |
| 1. Occupation | JJC: Study start – June 2023 = Clinical fellow in pediatric neurology/neurogenetics. July 2023 – current = Assistant professor of pediatrics in the section of neurology  EAK: Study start – June 2023 = Clinical research assistant, MPH student. July 2023 – current: PhD student in public health.  AS: Study start – current = Clinical research coordinator.  JBB: Study start – current = Faculty researcher in health disparities and community engagement.  CAG: Study start – current = Faculty clinician scientist in neurogenetics. |
| 1. Gender | All of the researchers identified as female. |
| 1. Experience and training | JJC: Six years of training and clinical experience in pediatric neurology/neurogenetics. Training in qualitative research through mentorship by JBB, partnership with EAK, participation in the University of Colorado Anschutz Medical Campus Adult & Child Center for Outcomes Research & Delivery Science (ACCORDS) Qualitative Research Workshop and Surgical/subspecialty Clinical Outcomes Research (SCORE) fellowship program.  EAK:  Three years of training and experience in community and behavioral health public health research. Clinical research experience in pediatric neurology through the Pediatric Student Research Program at Washington University in St. Louis School of Medicine. Training in qualitative research through Master of Public Health education at Saint Louis University and doctoral program coursework, research, and publications at the University of Iowa. Additional qualitative research training was completed through the Institute for Clinical and Translational Science at the University of Iowa.  AS: Five years of experience as a clinical research coordinator at the authors’ academic Intellectual and Developmental Disabilities Research Center.  JBB: Over twenty years of experience as a health disparities scientist with expertise in community-engaged research. Extensive experience with qualitative and mixed methods.  CAG: Twenty years of clinical experience in pediatric neurology/neurogenetics. Extensive experience in research as primary investigator of studies ranging from basic science to clinical gene discovery to community-based projects. |
| Relationship with Participants |  |
| 1. Relationship established | The researchers did not have a personal relationship with the participants prior to study commencement. Though JJC and CAG were physicians in the pediatric neurology clinic from which participants were recruited, neither was the primary neurologist for any of the participants. |
| 1. Participant knowledge of the interviewer | Participants were told that the interviewer’s goals were to understand more about lived experiences and perspectives of parents of children with neurodevelopmental disorders. Participants were told that their interview responses would have no impact on their child’s clinical care. |
| 1. Interviewer characteristics | Assumptions: The researchers assumed that individuals from historically marginalized backgrounds would express more barriers to genetic testing. Personal interests: The researchers were motivated by a desire to improve health equity. |
| **Domain 2: Study Design** | |
| Theoretical Framework |  |
| 1. Methodological orientation and Theory | Content analysis was the methodological orientation used. |
| Participant Selection |  |
| 1. Sampling | Both convenience and purposeful sampling were used.  Detailed Eligibility Criteria: Global developmental delay/Intellectual disability (GDD/ID) diagnoses were based on electronic health record (EHR) review and broadly defined as presence of ANY of the following: 1) Item on the patient’s problem list explicitly includes the term “global developmental delay” OR “intellectual disability”; 2) Neurology clinic note(s) explicitly include “global developmental delay”, “GDD”, “intellectual disability”, and/or “ID” within the history of present illness, past medical history, or assessment/plan sections; 3) Prior formal neuropsychological or developmental testing documented within the EHR demonstrates findings consistent with GDD/ID; 4) Detailed school history documented in clinic note(s) indicates level of academic/adaptive functioning consistent with ID; or 5) Detailed developmental history documented in clinic note(s) indicates level of developmental functioning consistent with GDD.  Detailed Exclusion Criteria: 1) No EHR-based historical or current diagnosis of GDD or ID; 2) Child >=18 years old at most recent neurology clinic visit; 3) Child in foster care; 4) Child not seen in pediatric neurology clinic within one year of recruitment date; 5) Clearly-documented acquired etiology of child’s GDD/ID; 6) Trisomy 21 diagnosed prenatally or immediately after birth; and 7) Non-English-speaking. |
| 1. Method of approach | Convenience sample: From January to May 2023, flyers were posted in the pediatric neurology clinic waiting rooms and examination rooms. Instructions were also given to the check-in team at the pediatric neurology clinic front desk to hand out these flyers to each caregiver. The flyers contained a QR code survey link for those interested to provide their contact information. A study team member (JJC) then screened the associated patient’s electronic health record (EHR) to determine eligibility and then contacted the caregiver by email and/or phone to provide more information and schedule an interview date.  Purposeful sample: For patients who were seen in the pediatric neurology clinic between 1/15/23 to 3/15/23 who had not responded to the QR code survey link and who had race/ethnicity identified as Black/African American (including multiracial) in the EHR, EHR-based eligibility screening was completed by JJC. Those eligible were contacted by phone for recruitment. |
| 1. Sample size | 18 caregivers were interviewed for the study.  Consent details: Informed consent forms were provided to participants by email, shared virtually over video platform, or read aloud by the interviewer, as preferred by the participant. Immediately prior to the start of the interview, the consent form was reviewed and verbal consent was obtained from each participant. |
| 1. Non-participation | Numbers of individuals who were screened for eligibility based on the sampling methods outlined above are provided in detail in **Figure 1**. Reasons for ineligibility among those who were screened are also included, as are reasons for lack of participation among eligible individuals. For those who completed the QR code survey indicating interest in the study, they were considered “non-responders” when there was no response to two email messages and one voicemail left by phone. They were considered “unable to contact” if both the email/phone addresses provided did not accept messages. For the purposive sample, only one recruitment phone call was made per patient. If the caregiver did not answer, a voicemail was left briefly explaining the study and requesting a call back if interested. Those who did not answer the phone or respond to the voicemail were considered “non-responders”. Those whose phones were not in service or had full voicemail boxes were considered “unable to contact”. Those who scheduled interviews but did not show up and were unable to reschedule were considered “no-show”. Those who declined participation were considered “declined”. Reasons for declining were not provided. |
| Setting |  |
| 1. Setting of data collection | The setting for this study was the catchment area of a tertiary care children’s hospital’s pediatric neurology clinic within a metropolitan county in a Midwestern state. The interviews took place by video or phone, with interviewers located in a private, quiet room at home or the workplace, and participants located at their location of choice. |
| 1. Presence of non-participants | For the majority of the interviews, only the interviewer and the participant were present. On the interviewers’ end, there were never any non-participants present. On the participants’ end, there were instances of non-participants present. Of the non-participants who were identified during the interviews, they were all small children requiring the parent’s care. For the phone-based interviews, it is possible that additional non-participants were present who were not identified during the interviews. |
| 1. Description of sample | The demographic characteristics of the interview participants and their children with GDD/ID are outlined in **Table 1** and **Table 2**. |
| Data Collection |  |
| 1. Interview guide | The interview guide is provided in **Appendix B**. It was pilot tested in one caregiver of children with GDD/ID. The original version of this adapted interview guide was developed, piloted, and used in a prior study investigating the diagnostic odyssey among African American children with autism spectrum disorder. (Constantino JN, Abbacchi AM, Saulnier C, et al. Timing of the Diagnosis of Autism in African American Children. *Pediatrics*. 2020;146(3):e20193629. doi:10.1542/peds.2019-3629). |
| 1. Repeat interviews | No repeat interviews were conducted as part of this study. |
| 1. Audio/visual recording | The interviews were audio/video recorded to allow for data transcription. |
| 1. Field notes | Field notes were made after each interview as needed. |
| 1. Duration | The interviews lasted approximately 45-60 minutes each. |
| 1. Data saturation | The interviewers discussed periodically whether they felt that data saturation had been reached. They agreed when data saturation had been reached. |
| 1. Transcripts returned | Transcripts were not returned to participants for comment and/or correction. |
| **Domain 3: Analysis and Findings** | |
| Data Analysis |  |
| 1. Number of data coders | One (EAK) |
| 1. Description of the coding tree | The codebook is provided in **Appendix C**. |
| 1. Derivation of themes | The themes were derived from the data. |
| 1. Software | Dedoose, a qualitative analysis software, was used. |
| 1. Participant checking | Participants did not provide feedback on the findings. |
| Reporting |  |
| 1. Quotations presented | Quotations illustrating the themes/findings are provided in **Table 3**. Participant numbers are provided for the quotes. |
| 1. Data and findings consistent | The Discussion section describes the findings as related to what was shown in the data. |
| 1. Clarity of major themes | The major themes are described in the Results section and discussed in the Discussion section. |
| 1. Clarity of minor themes | Within each of the major themes, there is discussion of variability in responses amongst participants. |

1 Tong A, Sainsbury P, Craig J. Consolidated criteria for reporting qualitative research (COREQ): a 32-item checklist for interviews and focus groups. *Int J Qual Health Care*. Dec 2007;19(6):349-57. doi:10.1093/intqhc/mzm042
