# Supplementary material for: Social Determinants of Health, the Diagnostic Odyssey, and Genetic Testing for Global Developmental Delay/Intellectual Disability: A Qualitative Study
Source: Research Square preprint supplement (doi:10.21203/rs.3.rs-8378360/v1), 2026-01-28
Supplement: Supplementary file 3 [file ebc5596cebd5c8ed767eb9e4.docx]

**Additional File 2: Semi-Structured Qualitative Interview Guide**

Adapted from: Event History Calendar Interview: Diagnostic Odyssey1

Adapted by: Jordan J. Cole, MD and Emily A. Killian, MPH

**INTRODUCTION**

Hello! This is **[name]** from [**institution**] and I am a researcher in the child neurology department. Is this **[participant’s name]**?

Okay, great! As you know, I’m calling you today to interview you about your experience as a caretaker of a child with a neurodevelopmental disorder. The interview should take roughly 40 minutes. Did you have any questions before we get started?

Perfect. Also, as long as it is okay with you, I would like to record our conversation today so that I can capture what you actually say instead of trying to remember what I think you said. Do I have your permission to do that?

Great, thank you! And, just a reminder, I am not looking for any right or wrong answers. I just want to hear about your experience and opinions from your own perspective. Does that all sound okay?

**DEMOGRAPHICS**

Perfect. Okay so to start off, I have some quick demographic questions for you. 

1. How many people live in your household?
2. How many of those people are adults, and how many are children?
3. Are you married, widowed, divorced, separated, never married, or living with a partner?
4. What is your (and your partner’s) race and ethnicity?
5. What is your child’s (the patient) race and ethnicity?
6. What is your child’s (the patient) current age?
7. What is your home address?
8. What is your (and your partner’s) highest level of education?
9. Do you receive any benefits like food stamps, child support, SSI, or other financial assistance?
10. Does your child have any kind of health care coverage?
    1. What type of insurance is it?

**DIAGNOSTIC ODYSSEY**

First, I have some questions about the pathway you took to getting your child diagnosed. Understanding this pathway is important for us to determine any difficulties there may be for other families like yours to receive a diagnosis.

1. When did you first notice that something was not quite right in your child’s development?
   1. What year was that?
   2. How old was your child at this time?
   3. Do you remember any important events to your or your family right around this time? This can help jog your memory about this time in your life.
      1. This could be things like moving, starting/stopping a job, the birth of another child, the passing of a loved one, or other major events.
2. Were you the first person who was concerned that something didn’t seem right with your child’s development?
   1. If not, who was the first person who said they were concerned?
3. What was it that gave you (or the other person) concern at that time?
4. Did you share your concerns with any of the following people? **(Ask in hierarchical order - once they answer, move to question five.**
   1. Pediatrician or health care provider
   2. Childcare provider or teacher/school staff
   3. Clergy/church staff
   4. Spouse/partner, family member or friend
   5. Someone else?
5. How old was your child when you shared your concerns with this person? Did that person do any of these things?
   1. **If doctor of some kind:**
      1. Conduct development tests, make a referral to a specialist, tell you nothing was wrong, or suggest that you discuss the concern with your child’s school?
   2. **If childcare or teacher:**
      1. Conduct developmental tests, refer to your pediatrician, or tell you nothing was wrong?
   3. **If clergy or family members:**
      1. Refer to your pediatrician, tell you nothing was wrong, or suggest that you discuss the concern with your child’s school?
6. Did you ever feel like your concerns were not taken seriously?
7. Did you ever feel like someone was trying to keep you from seeking help for your child?
8. At this time, did your child have a doctor that they usually went to for well check-ups when he/she wasn’t sick?
9. Was your child’s insurance coverage a problem at the time of initial concern or has your child ever been uninsured?

**Introduction to Question 20:** Now, we’re going to talk about the details of how you actually got your child diagnosed with a developmental problem. (Offer examples if needed).

1. What was your child’s pathway to getting diagnosed? What was the diagnosis? (Looking for GDD etc.)
   1. How old was the child when the diagnosis was made?
   2. Who first gave your child the diagnosis?
      1. Pediatrician, primary care doctor, developmental pediatrician, clinical psychologist, neurologist, team of health professionals, or someone else?
2. Were any of the following a problem with your experience of getting a diagnosis for your child? (Ask probing questions).
   1. Wait time to get an appointment, cost of the evaluation, availability of an evaluation in your area, poor quality of the evaluation, scheduling conflicts, transportation, insurance problems, finding time to attend the appointment, language barriers, misunderstanding that may have resulted from cultural differences between you and the clinician, or something else?
3. How satisfied were you with the diagnosis once you got it?

**MRI/GENETIC TESTING**

Now I have some questions about any testing your child may have had so far. Your answers to these questions will help us understand parental beliefs and knowledge about diagnostic testing.

1. When the diagnosis of a neurodevelopmental disorder was made, OR over the **[months/years]** since the diagnosis, were MRIs or genetic testing recommended by your doctor to find out a reason why your child has this disorder?
   1. MRI (pictures of the brain and/or spine)
      1. **YES discussed and completed:**
         1. What were your thoughts about getting this test?
         2. Did you find the results useful?
         3. Were there any difficulties in getting this test done?
      2. **YES discussed, NOT completed:**
         1. Why not? Were any of the following a factor in your decision?
            1. Examples: Cost, insurance, transportation, time off work, childcare for siblings, other family members did not agree, or anything else?
      3. **NO, not discussed:**
         1. If your doctor had recommended this test, what do you think your perspective would have been?
   2. Genetic testing
      1. **YES discussed and completed:**
         1. Do you know what specific genetic test was completed?
         2. What did the pathway to actually completing the genetic testing look like?
         3. Did you have to see another specialist?
         4. What were your thoughts about getting this test? Did you find the results useful?
         5. Were there difficulties in getting this test done?
         6. Did your insurance cover the cost of genetic testing?
         7. Did the genetic testing lead to a more specific diagnosis for your child?
            1. **If yes:**

Do you see any positive impacts from having gotten this diagnosis for your child?

Examples: changes in medical management, facilitates access to disease-specific services, knowledge about cause, progression, and family risk, no positive impact

Do you see any negative impacts from having gotten this diagnosis for your child?

Examples: lifestyle restrictions, subject to discrimination and/or being labelled, receiving a poor diagnosis, no negative impact

- - - - 1. **If no:**

Do you see any positive impacts from having gotten the genetic testing for your child?

Examples: changes in medical management, facilitates access to disease-specific services, knowledge about cause, progression, and family risk, no positive impact

Do you see any negative impacts from having gotten the genetic testing for your child?

Examples: lifestyle restrictions, subject to discrimination and/or being labelled, receiving a poor diagnosis, no negative impact

- - 1. **YES discussed, NOT completed:**
       1. Why not?
          1. Examples: Cost, insurance, transportation, time off work, childcare for siblings, other family members didn’t agree
       2. Do you see any potential positive impacts of genetic testing for your child?
       3. Do you see any potential negative impacts of genetic testing for your child?
    2. **NO, not discussed:**
       1. If your doctor had recommended this test, what do you think your perspective would have been?
          1. Do you see any potential positive impacts of genetic testing for your child?
          2. Do you see any potential negative impacts of genetic testing for your child?

**CAREGIVER OPINIONS**

Lastly, I want to ask your opinions on your experience. Your opinions as a caretaker of your child are important for us to understand lived experiences, challenges, and triumphs you have gone through to get to this point.

1. What part of the process of getting a diagnosis for your child has been the most challenging?
2. How much do each of these factors affect your family’s health in general?
   1. Cultural background (race, ethnicity, culture, ability to speak English, discrimination)
   2. Genetics (health problems that run in the family, your genes/genetics)
   3. Socioeconomic status (income, family income, education, insurance status, occupation)
   4. The community where you live
3. Do you have any other opinions, comments, or concerns you would like to share about your experience?

**FUTURE DIRECTIONS/FEEDBACK**

Before we wrap up, I’d like to ask your help with two final questions related to how we as researchers can make sure we are reflecting parents’ interests and goals.

1. First, we are hoping to be able to reach more parents of kids with neurodevelopmental disorders like yourself, especially those who may not interact with the health system. Do you have any ideas about ways we could reach those families?
   1. if “no”, prompt by asking, what about schools? Any other community organizations?
2. Second, we want to hear any feedback from you about how we could improve this interview. Was there anything you felt could have been phrased differently? Anything that you would have preferred we had not asked about or that you wish was asked about that wasn’t?

**CONCLUSION**

Thank you so much for all of your insights and for your time! We really appreciate it.

Have a nice day!

1. Constantino JN, Abbacchi AM, Saulnier C, et al. Timing of the Diagnosis of Autism in African American Children. *Pediatrics*. Sep 2020;146(3)doi:10.1542/peds.2019-3629
